# Supplementary material for: Effect of BBT-877, a novel inhibitor of ATX, on a mouse model of type 1 diabetic nephropathy
Source: publisher site journal article supplement (doi:10.18632/aging.204249), 2022-08-26
Supplement: Supplementary file [file aging-v14i16-204249-supplementary-material-SD1.pdf]

SUPPLEMENTARY FIGURES

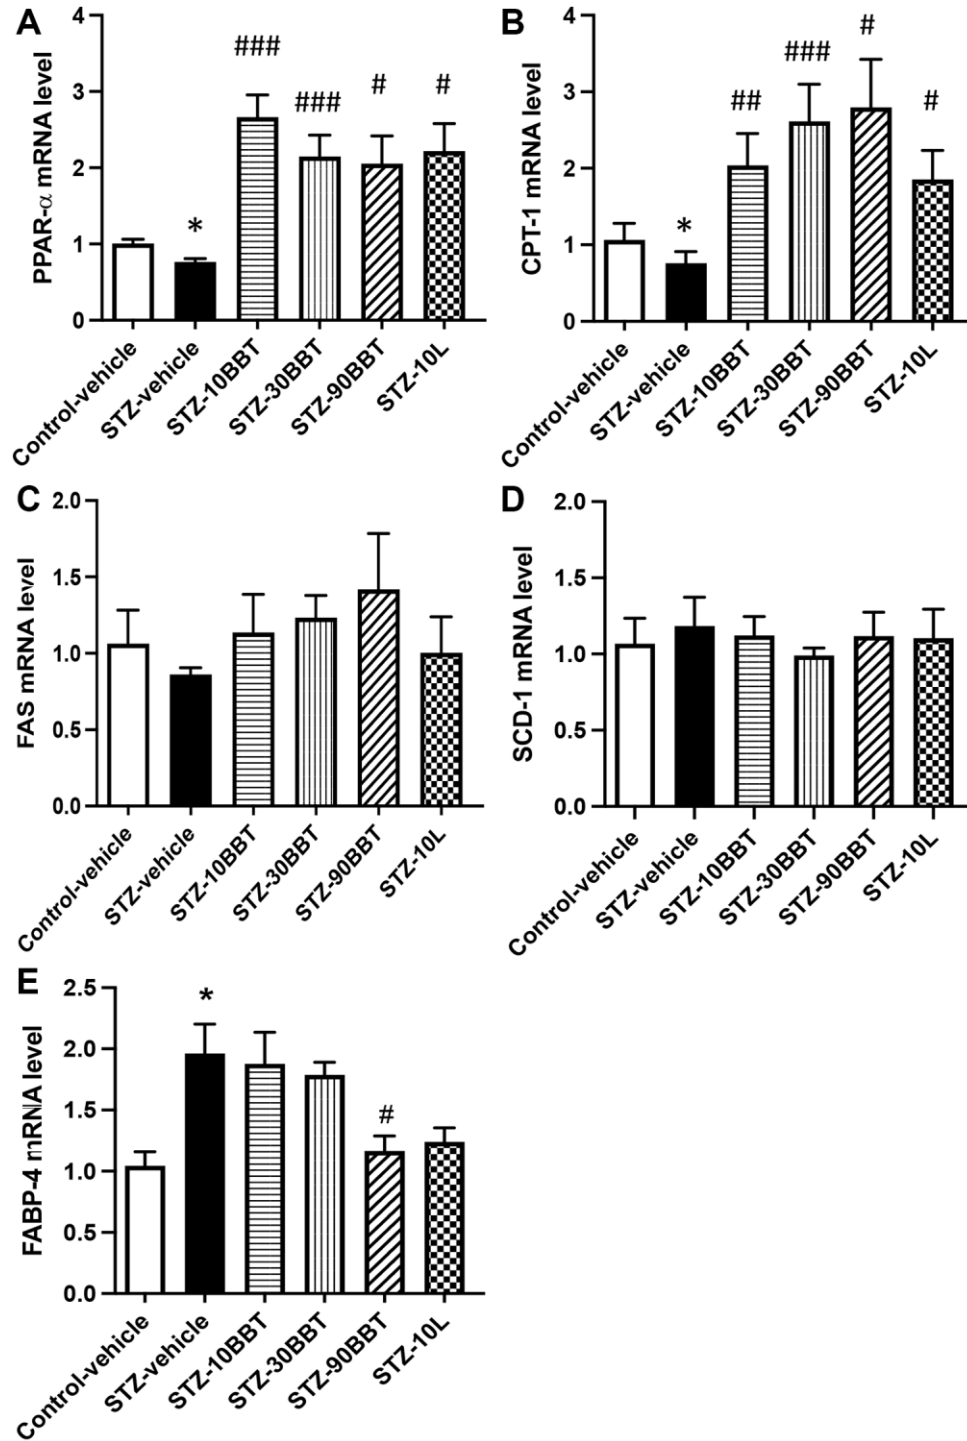

**Supplementary Figure 1. BBT-877 reduces fat accumulation in the liver in STZ-induced diabetic mice.** After treatment with BBT-877 for 8 weeks, mice were sacrificed, and their livers were collected. RNA was extracted and subjected to qRT-PCR for analyzing (A) PPAR- $\alpha$ , (B) CPT-1, (C) FAS, (D) SCD-1, and (E) FABP-4 expression levels. Abbreviations: STZ: streptozotocin; qRT-PCR: quantitative reverse transcriptase-polymerase chain reaction. STZ-10BBT contains 10 mg/kg of BBT-877; STZ-30BBT contains 30 mg/kg of BBT-877; STZ-90BBT contains 90 mg/kg of BBT-877; and STZ-10L contains 10 mg/kg of losartan. \* $p < 0.05$ , control-vehicle vs. STZ-vehicle, # $p < 0.05$ , STZ-vehicle vs. STZ-10, 30, 90BBT or STZ-10L,  $n = 8-10$ .

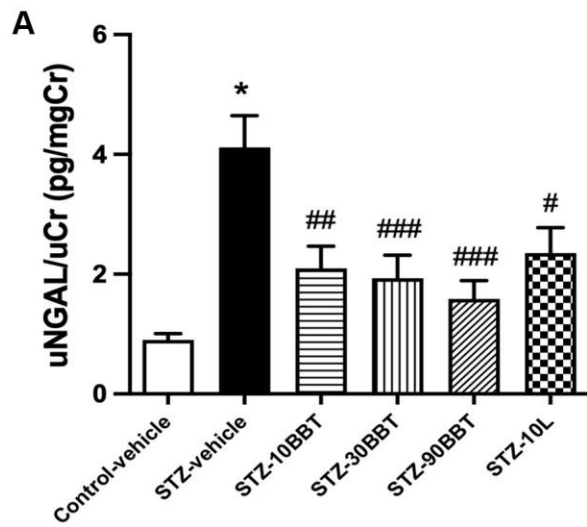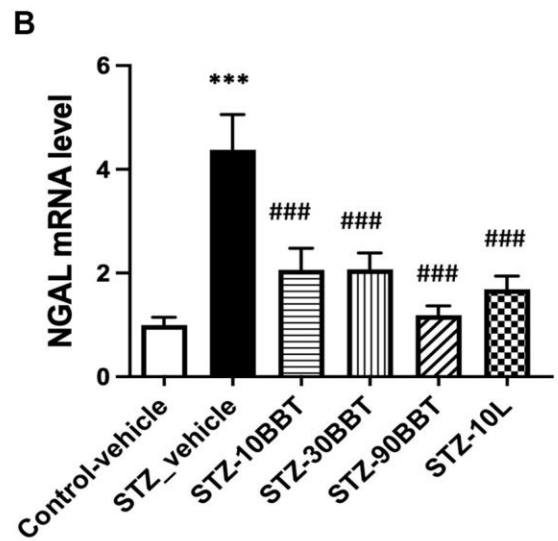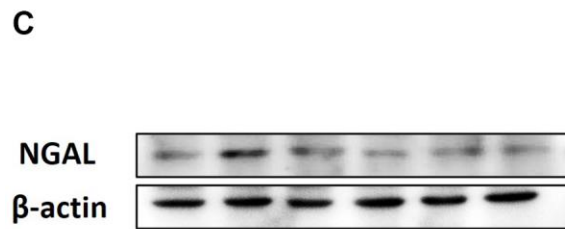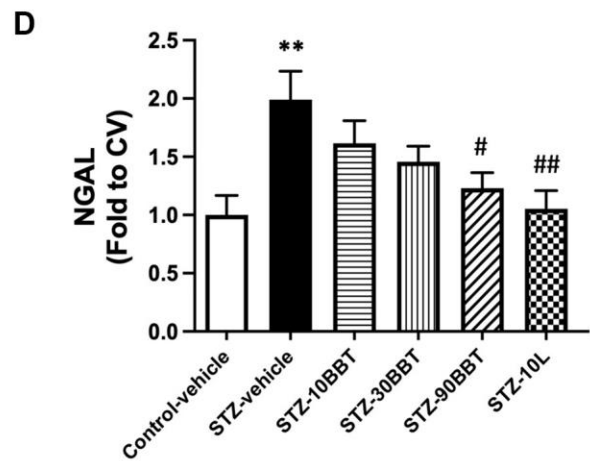

**Supplementary Figure 2. BBT-877 reduces glomerular injury in the kidneys of STZ-induced diabetic mice.** After treatment with BBT-877 for 8 weeks, urinary neutrophil gelatinase-associated lipocalin (NGAL) were measured. (A) Urinary NGAL level; (B) NGAL mRNA in kidney tissue; (C) Representative image; (D) Urinary NGAL protein level in kidney tissue. Abbreviation: STZ: streptozotocin. STZ-10BBT stands for BBT-877 10 mg/kg; STZ-30BBT stands for BBT-877 30 mg/kg; STZ-90BBT stands for BBT-877 90 mg/kg; and STZ-10L stands for losartan 10 mg/kg. \* $p < 0.05$ , control-vehicle vs. STZ-vehicle, # $p < 0.05$ , STZ-vehicle vs. STZ-10, 30, 90BBT or STZ-10L,  $n = 8-10$ .
